# Supplementary material for: Mesenchymal stem/stromal cells-derived IL-6 promotes nasopharyngeal carcinoma growth and resistance to cisplatin via upregulating CD73 expression
Source: PubMed Central journal article supplement (PMC7052921; doi:10.7150/jca.37932), 2020-02-03
Supplement: jcav11p2068s1.pdf [file jcav11p2068s1.pdf]

## Supplementary Material

Table S1. NPC patients' characteristics

|                 | Parameters | n  |
|-----------------|------------|----|
| Gender          | Female     | 23 |
|                 | Male       | 27 |
| Age (years)     | <50        | 20 |
|                 | ≥50        | 30 |
| Smoking history | Yes        | 31 |
|                 | No         | 19 |
| Clinical stage  | I          | 12 |
|                 | II         | 11 |
|                 | III        | 16 |
|                 | IV         | 11 |
| T stage         | T1         | 14 |
|                 | T2         | 13 |
|                 | T3         | 14 |
|                 | T4         | 9  |

**Table S2. A list of primers used in the reactions**

---

|                              |                                                  |
|------------------------------|--------------------------------------------------|
| NT5E(CD73) promoter-F        | 5'-GTACCCACAGATACCAGGCAATG-3'                    |
| NT5E(CD73) promoter-R        | 5'-GTTTGTGGTTGCGCTAGCTC-3'                       |
| NT5E(CD73)<br>promoter-mut-F | 5'-ATGGCCCCCAGGCCTGGATGATTTACAATCTCCGAACCTCAG-3' |
| NT5E(CD73)<br>promoter-mut-R | 5'-AATCATCCAGGCCTGGGGGCCATGCAGTTTGGGAG-3'        |
| NT5E(CD73)-P1-F              | 5'-CTTGGCCTAAGGACAGACTGG 3'                      |
| NT5E(CD73)-P1-R              | 5'-AGTTCAAGCTTCGCAAACCTGG-3'                     |
| NT5E(CD73) -P2-F             | 5'-CATTAGAGGGTGTCCCAGAAGC-3'                     |
| NT5E(CD73)-P2-R              | 5'-TGACCTGAGGTTCCGGAGATTG-3'                     |
| NT5E(CD73)-P3-F              | 5'-CTCAGCTCGCTCATCTTTCTTC-3'                     |
| NT5E(CD73)-P3-R              | 5'- CTCTGAGTCTCGCCTCATTCG-3'                     |
| GAPDH-F                      | 5'-ATTCCACCCATGGCAAATTC-3'                       |
| GAPDH-R                      | 5'-TGGGATTTCCATTGATGACAAG-3'                     |

---

## Supplementary Figures legends

**Figure S1. Protein chip detection in four matched NPC tissues and paracancerous tissues**

**Figure S2. MSC promote NPC cell lines CNE-1 and CNE-2 cell proliferation**

Cell viability of CNE-1 (A) and CNE-2 (B) under treatment of MSC-conditioned medium. \*,  $P < 0.05$ ; \*\*,  $P < 0.01$ ; \*\*\*,  $P < 0.001$ .

**Figure S3. Detection of cytokine secreted by MSC via cytokine antibody array.**

Detection of supernatant cytokine secreted by CNE-2, MSC, CNE-2 mixed MSC co-culture(1:1) (A). Differential cytokine analysis between CNE-2 mixed MSC co-culture(1:1) and CNE-2 (B). Differential cytokine analysis between CNE-2 mixed MSC co-culture(1:1) and MSC (C). Differential cytokine analysis between MSC and CNE-2 (D).

## Supplementary Figures

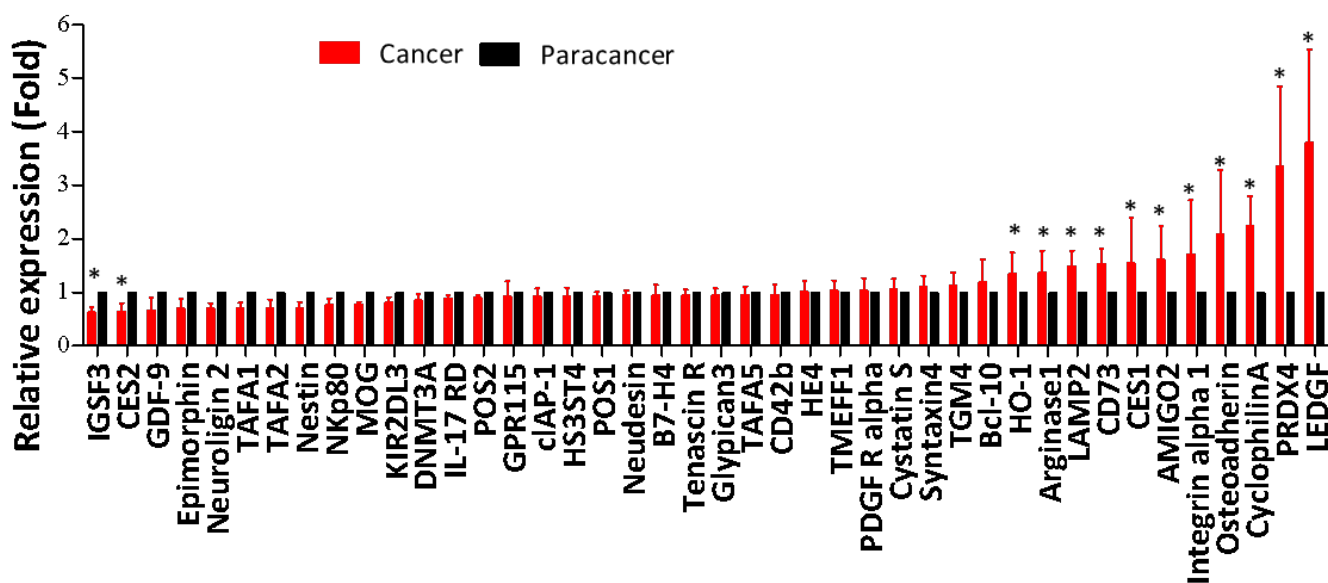

**Figure S1. Protein chip detection in four matched NPC tissues and paracancerous tissues**

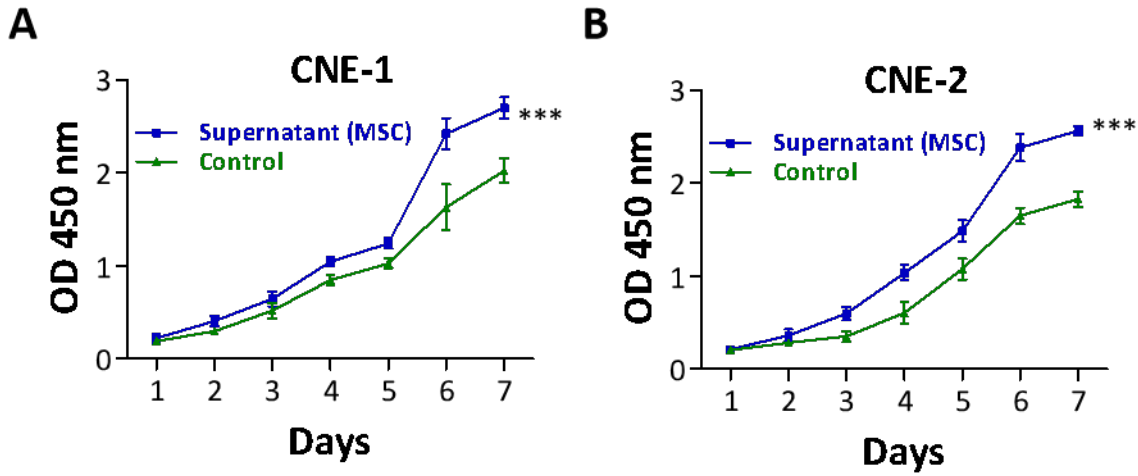

Figure S2. MSC promote NPC cell lines CNE-1 and CNE-2 cell proliferation

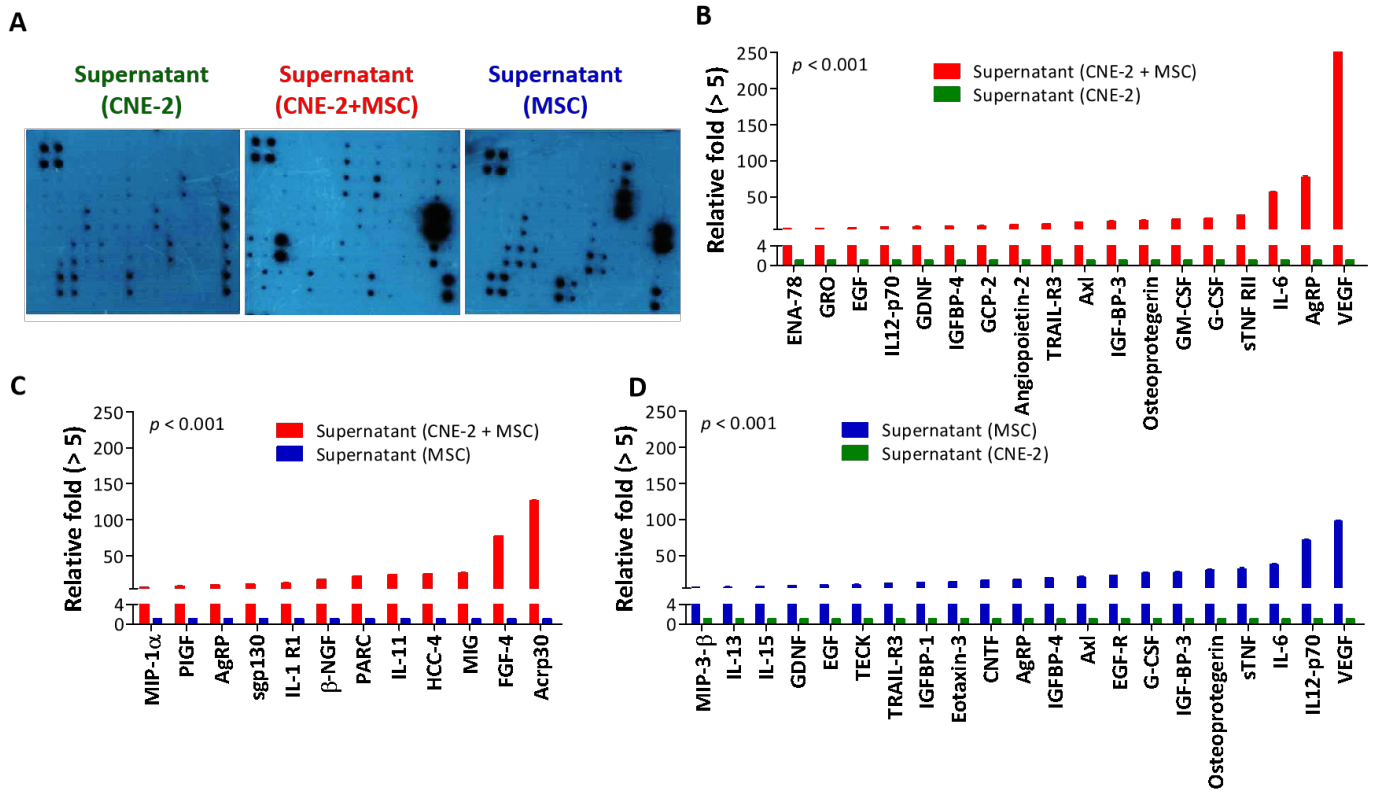

Figure S3. Detection of cytokine secreted by MSC via cytokine antibody array.
